# Supplementary material for: Identification of PSMD7 as a prognostic factor correlated with immune infiltration in head and neck squamous cell carcinoma
Source: Oxford University Press journal article supplement (doi:10.1042/bsr20203829), 2021-03-01
Supplement: bsr-2020-3829_supp.pdf [file bsr-2020-3829_supp.pdf]

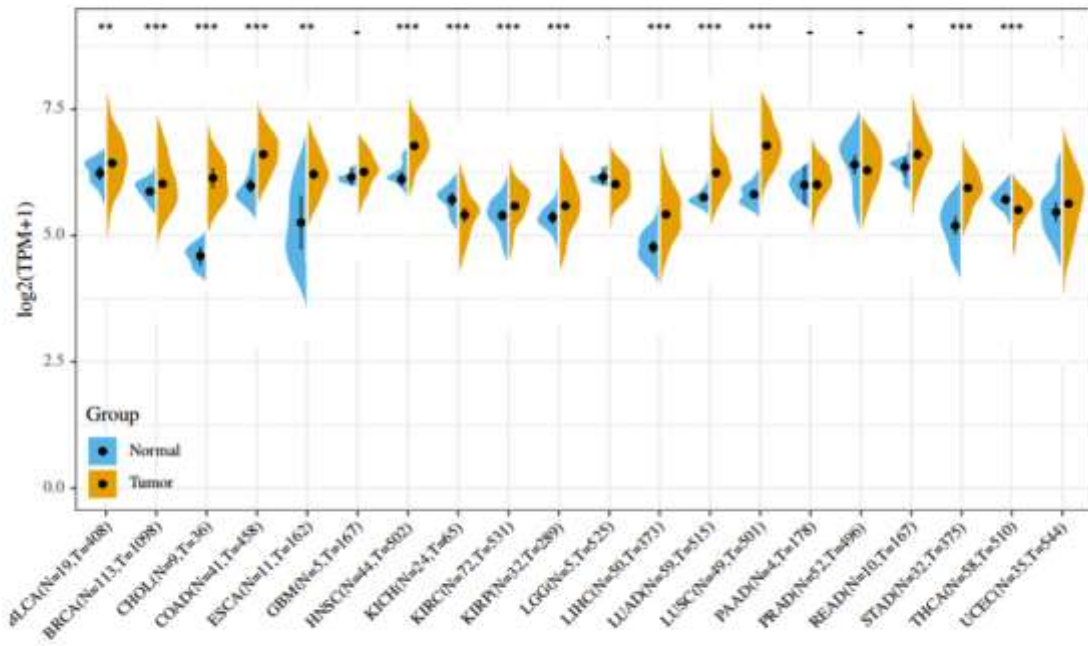

**Supplemental Figure 1. The transcription level of PSMD7 in different human cancers.** PSMD7 expression levels in various types of cancer in the Sangerbox database.

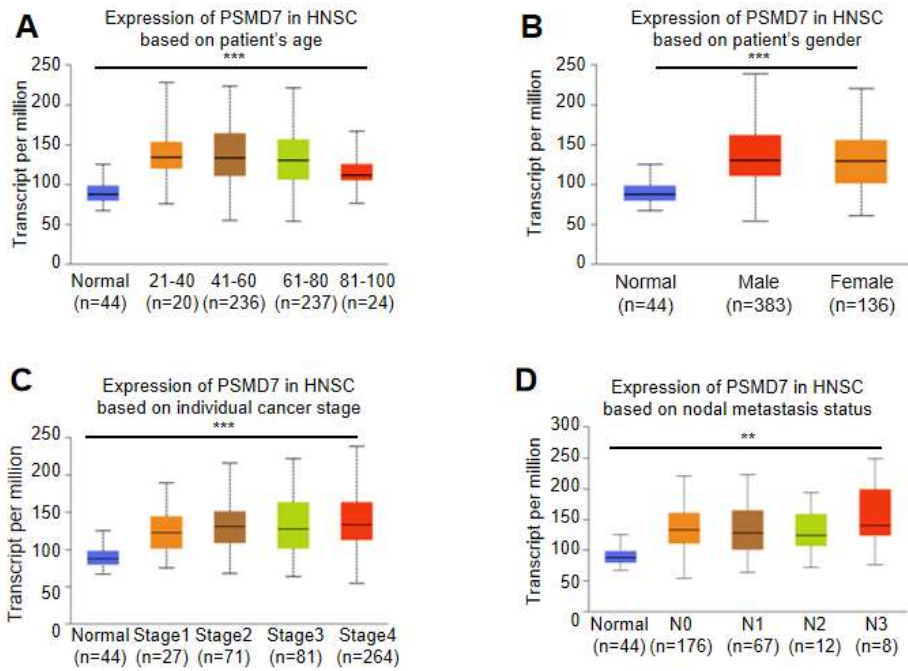

**Supplemental Figure 2. Expression of PSMD7 based on clinical pathological parameters in HNSCC patients in the UALCAN database.** PSMD7 expression was analyzed in (A) different ages (from 21 to 100 years), (B) male and female HNSCC patients, (C) cancer clinical stages of HNSCC (from stage 1 to stage 4) and (D) different nodal metastasis statuses (from N0 to N3). \*,  $P < 0.05$ ; \*\*,  $P < 0.01$ ; \*\*\*,  $P < 0.001$ ; PSMD7, Proteasome 26S subunit, non-ATPase 7; HNSCC, head and neck squamous-cell carcinoma;

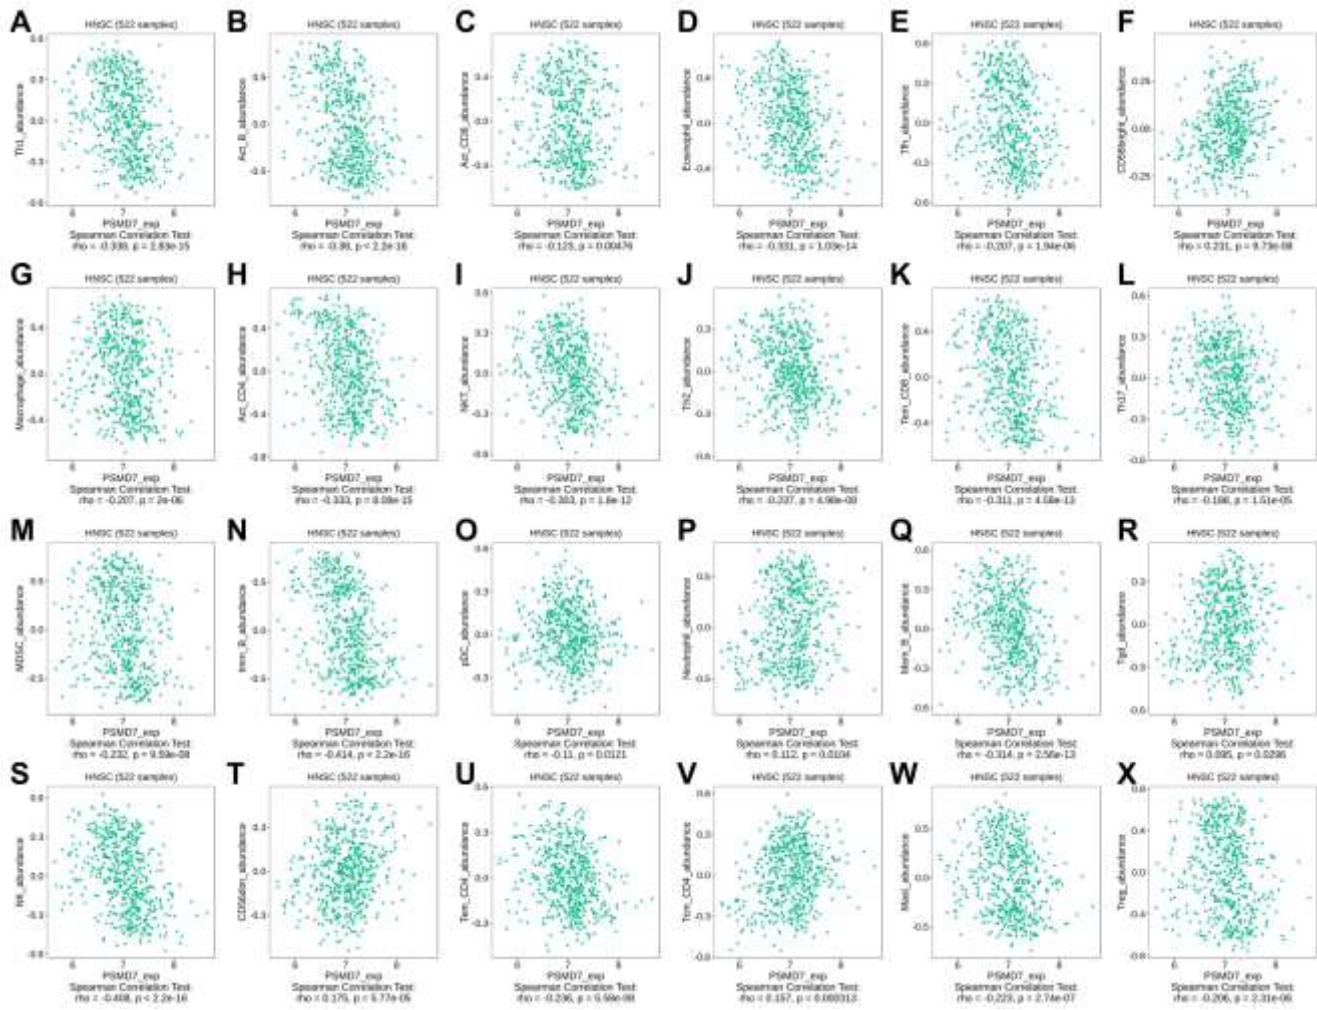

**Supplemental Figure 3. PSMD7 expression was associated immune cell distribution with TISIDB analysis in HNSCC.** (A-X) Positive relationship was found between different immune cell distribution and PSMD7 expression. PSMD7, Proteasome 26S subunit, non-ATPase 7; HNSCC, head and neck squamous-cell carcinoma

**Supplemental Table 1. GSEA Analysis of DEGs based on PSMD7 high expression.**

| NAME                             | SIZE | ES       | NES      | NOM p-val | FDR q-val |
|----------------------------------|------|----------|----------|-----------|-----------|
| HALLMARK_MTORC1_SIGNALING        | 198  | -0.78207 | -2.3837  | 0         | 0         |
| HALLMARK_UV_RESPONSE_UP          | 156  | -0.66582 | -2.35985 | 0         | 0         |
| HALLMARK_P53_PATHWAY             | 197  | -0.66642 | -2.31532 | 0         | 0         |
| HALLMARK_APOPTOSIS               | 160  | -0.67221 | -2.28029 | 0         | 0         |
| HALLMARK_PI3K_AKT_MTOR_SIGNALING | 104  | -0.75971 | -2.27722 | 0         | 0         |
| HALLMARK_UNFOLDED_PROTEIN_RESPON | 110  | -0.78359 | -2.26838 | 0         | 0         |
| HALLMARK_GLYCOLYSIS              | 197  | -0.67428 | -2.23088 | 0         | 0         |
| HALLMARK_HEME_METABOLISM         | 197  | -0.66872 | -2.22864 | 0         | 0         |
| HALLMARK_PEROXISOME              | 104  | -0.67557 | -2.17367 | 0         | 0         |
| HALLMARK_ANDROGEN_RESPONSE       | 96   | -0.70589 | -2.15798 | 0         | 0         |
| HALLMARK_ESTROGEN_RESPONSE_LATE  | 197  | -0.5808  | -2.14828 | 0         | 0         |
| HALLMARK_DNA_REPAIR              | 148  | -0.73819 | -2.14168 | 0         | 0         |
| HALLMARK_APICAL_JUNCTION         | 194  | -0.65058 | -2.13926 | 0         | 0         |
| HALLMARK_PROTEIN_SECRETION       | 95   | -0.80144 | -2.12546 | 0         | 0         |
| HALLMARK_MYC_TARGETS_V1          | 197  | -0.80407 | -2.1069  | 0         | 0         |
| HALLMARK_ADIPOGENESIS            | 194  | -0.66715 | -2.10544 | 0         | 0         |
| HALLMARK_MYC_TARGETS_V2          | 58   | -0.82682 | -2.10115 | 0         | 0         |
| HALLMARK_MITOTIC_SPINDLE         | 198  | -0.7809  | -2.09593 | 0         | 6.46E-05  |
| HALLMARK_ESTROGEN_RESPONSE_EARLY | 195  | -0.59677 | -2.08646 | 0         | 1.19E-04  |
| HALLMARK_TNFA_SIGNALING_VIA_NFKB | 198  | -0.64711 | -2.0835  | 0         | 1.13E-04  |
| HALLMARK_IL2_STAT5_SIGNALING     | 196  | -0.61867 | -2.07302 | 0         | 1.07E-04  |
| HALLMARK_HYPOXIA                 | 191  | -0.6038  | -2.06813 | 0         | 1.55E-04  |
| HALLMARK_REACTIVE_OXYGEN_SPECIES | 47   | -0.70712 | -2.05963 | 0         | 1.94E-04  |
| HALLMARK_XENOBIOTIC_METABOLISM   | 199  | -0.57102 | -2.05719 | 0         | 2.31E-04  |
| HALLMARK_TGF_BETA_SIGNALING      | 54   | -0.76793 | -2.05353 | 0         | 2.22E-04  |
| HALLMARK_G2M_CHECKPOINT          | 192  | -0.77734 | -2.04095 | 0         | 2.61E-04  |
| HALLMARK_CHOLESTEROL_HOMEOSTASIS | 74   | -0.65079 | -2.03679 | 0         | 3.41E-04  |
| HALLMARK_SPERMATOGENESIS         | 135  | -0.55301 | -1.98281 | 0         | 0.001236  |
| HALLMARK_UV_RESPONSE_DN          | 137  | -0.67848 | -1.98233 | 0         | 0.001194  |
| HALLMARK_COMPLEMENT              | 199  | -0.59433 | -1.96862 | 0.00396   | 0.001311  |
| HALLMARK_INFLAMMATORY_RESPONSE   | 198  | -0.61558 | -1.9663  | 0.008163  | 0.001302  |
| HALLMARK_FATTY_ACID_METABOLISM   | 157  | -0.6024  | -1.95466 | 0         | 0.001527  |
| HALLMARK_OXIDATIVE_PHOSPHORYLATI | 184  | -0.68995 | -1.92536 | 0         | 0.002187  |
| HALLMARK_KRAS_SIGNALING_UP       | 195  | -0.5582  | -1.92081 | 0         | 0.0023    |
| HALLMARK_WNT_BETA_CATENIN_SIGNAL | 42   | -0.68214 | -1.91791 | 0         | 0.002331  |
| HALLMARK_E2F_TARGETS             | 197  | -0.76037 | -1.91689 | 0         | 0.002266  |
| HALLMARK_NOTCH_SIGNALING         | 32   | -0.66385 | -1.86747 | 0.002041  | 0.003856  |
| HALLMARK_BILE_ACID_METABOLISM    | 112  | -0.54376 | -1.84299 | 0.00207   | 0.005139  |
| HALLMARK_IL6_JAK_STAT3_SIGNALING | 86   | -0.59106 | -1.81202 | 0.017578  | 0.0065    |
| HALLMARK_INTERFERON_GAMMA_RESPON | 199  | -0.65129 | -1.79723 | 0.024793  | 0.007539  |
| HALLMARK_HEDGEHOG_SIGNALING      | 35   | -0.6102  | -1.7791  | 0.005906  | 0.008907  |
| HALLMARK_APICAL_SURFACE          | 43   | -0.52892 | -1.7744  | 0.002041  | 0.008993  |
| HALLMARK_ANGIOGENESIS            | 36   | -0.61792 | -1.6956  | 0.026052  | 0.017864  |

NOM p-val < 0.05 and FDR q-val < 0.25 were considered as significant

Abbreviations: DEG, difference expression of gene; GSEA, gene set enrichment analysis; PSMD7, Proteasome 26S subunit, non-ATPase 7
